# Supplementary material
Source: Springer Nature journal article supplement (https://www.springermedizin.de/resource/supplementary/13048_2008_6_MOESM1_ESM.pdf/9664704)
Supplement: MOESM1 [file 9664704]

|             |                                                      |     |     |     |     |                         |     |
|-------------|------------------------------------------------------|-----|-----|-----|-----|-------------------------|-----|
|             | 10                                                   | 20  | 30  | 40  | 50  | 60                      |     |
| 1 PTTG1     | ATGGCTACTCTGATCTATGTTGATAAGGAAAATGGAGAACCAGGCCA      |     |     |     |     | CCCTGTGGT               | 60  |
| 2 PTTG3     | ATGGCTACTCTGATCTATGTTGATAAGGAAAAGGAGAACCAGGCCA       |     |     |     |     | CCCTGTGGCTAG            | 60  |
| 3 PTTG2     | ATGGCTACTCTGATCTAAGTTGATAAGGAAAATTGGAGAACCAGGCCA     |     |     |     |     | CCCTGTGGCTGCC           | 60  |
| 4 Consensus | ATGGCTACTCTGATCTATGTTGATAAGGAAAATGGAGAACCAGGCCA      |     |     |     |     | CCCTGTGGCTG             |     |
|             | 70                                                   | 80  | 90  | 100 | 110 | 120                     |     |
| 1 PTTG1     | AAGGATGCGCTGAAGCTGGGGTCTGGACCTTCAATCAAAGC            |     |     |     |     | TTAGATGGGAGATCTCA       | 120 |
| 2 PTTG3     | AAGGATGCGCTGAAGCTGGGGTCTGGACCTTCAATCAAAGC            |     |     |     |     | TTAGATGGGAGATCTCA       | 120 |
| 3 PTTG2     | AAGGATGCGCTGAAGCTGGGGTCTGGACCTTCAATCAAAGC            |     |     |     |     | TTAGATGGGATATCTCA       | 120 |
| 4 Consensus | AAGGATGCGCTGAAGCTGGGGTCTGGACCTTCAATCAAAGC            |     |     |     |     | TTAGATGGGAGATCTCA       |     |
|             | 130                                                  | 140 | 150 | 160 | 170 | 180                     |     |
| 1 PTTG1     | GTTTCAACACCAAGTTTTGGCAAAACATTCGATGCTCCGAC            |     |     |     |     | CCCTTACCTAAAGCTAG       | 180 |
| 2 PTTG3     | GTTTCAATATCATGTTTGGCAAAACATTCGATGCTCCGAC             |     |     |     |     | CCCTTACCTAAAGCTAAC      | 180 |
| 3 PTTG2     | GTTTCAACACCAAGTTTTGGCAAAACATTCGATGCTCCGAC            |     |     |     |     | CCCTTACCTAAAGCTAG       | 180 |
| 4 Consensus | GTTTCAACACCAAGTTTTGGCAAAACATTCGATGCTCCGAC            |     |     |     |     | CCCTTACCTAAAGCTAG       |     |
|             | 190                                                  | 200 | 210 | 220 | 230 | 240                     |     |
| 1 PTTG1     | AGAAAGGCTTTGGGCACTGTCAACAGAGCTACAGAAAAGTC            |     |     |     |     | GTAAAGACCAATGGACC       | 240 |
| 2 PTTG3     | AGAAAGGCTTTGGGCACTGTCAACAGAGCTACAGAAAAGTC            |     |     |     |     | GTAAAGACCAATGGACC       | 240 |
| 3 PTTG2     | AGAAAGGCTTTGGGCACTGTCAACAGAGCTACAGAAAAGTC            |     |     |     |     | GTAAAGACCAATGGACC       | 240 |
| 4 Consensus | AGAAAGGCTTTGGGCACTGTCAACAGAGCTACAGAAAAGTC            |     |     |     |     | GTAAAGACCAATGGACC       |     |
|             | 250                                                  | 260 | 270 | 280 | 290 | 300                     |     |
| 1 PTTG1     | CTCAACAAAAACAGCCAAGCTTTTCTGCCAAAAAGATGAC             |     |     |     |     | TGAGAAGACTGTTAAAGCA     | 300 |
| 2 PTTG3     | CTCAACAAAAACAGCCAAGCTTTTCTGCCAAAAAGATGAC             |     |     |     |     | TGAGAAGACTGTTAAAGCA     | 300 |
| 3 PTTG2     | AGAAACAAAAACAGCCAAGCTTTTCTGCCAAAAAGATGAC             |     |     |     |     | TGAGAAGACTGTTAAAGCA     | 300 |
| 4 Consensus | CTCAACAAAAACAGCCAAGCTTTTCTGCCAAAAAGATGAC             |     |     |     |     | TGAGAAGACTGTTAAAGCA     |     |
|             | 310                                                  | 320 | 330 | 340 | 350 | 360                     |     |
| 1 PTTG1     | AAAACTCTGTTCTGCTGCTCAGATGATGCTATCCAGAAATAGAAAAATT    |     |     |     |     | TTTCCCTTC               | 360 |
| 2 PTTG3     | AAAACTCTGTTCTGCTGCTCAGATGATGCTATCCAGAAATAGAAAAATT    |     |     |     |     | TTTCCCTTC               | 360 |
| 3 PTTG2     | AAAACTCTGTTCTGCTGCTCAGATGATGCTATCCAGAAATAGAAAAATT    |     |     |     |     | TTTCCCTTC               | 360 |
| 4 Consensus | AAAACTCTGTTCTGCTGCTCAGATGATGCTATCCAGAAATAGAAAAATT    |     |     |     |     | TTTCCCTTC               |     |
|             | 370                                                  | 380 | 390 | 400 | 410 | 420                     |     |
| 1 PTTG1     | AATCTCTAGACTTTGAGAGTTTTGACCTGCCTGAAGAGCA             |     |     |     |     | CCAGATTGCCACTCTCCCC     | 420 |
| 2 PTTG3     | AATCTCTAGACTTTGAGAGTTTTGACCTGCCTGAAGAGCA             |     |     |     |     | CCAGATTGCCACTCTCCCC     | 420 |
| 3 PTTG2     | AATCTCTAGACTTTGAGAGTTTTGACCTGCCTGAAGAGCA             |     |     |     |     | CCAGATTGCCACTCTCCCC     | 420 |
| 4 Consensus | AATCTCTAGACTTTGAGAGTTTTGACCTGCCTGAAGAGCA             |     |     |     |     | CCAGATTGCCACTCTCCCC     |     |
|             | 430                                                  | 440 | 450 | 460 | 470 | 480                     |     |
| 1 PTTG1     | TTGAGTGGAGTGCCTCTCATGATCTTGATGAGGAGA                 |     |     |     |     | GAGAGCTTGAAAAGCTGTTTCAG | 480 |
| 2 PTTG3     | TTGAGTGGAGTGCCTCTCATGATCTTGATGAGGAGA                 |     |     |     |     | GAGAGCTTGAAAAGCTGTTTCAG | 480 |
| 3 PTTG2     | TTGAGTGGAGTGCCTCTCATGATCTTGATGAGGAGG                 |     |     |     |     | GAGAGCTTGAAAAGCTGTTTCAG | 480 |
| 4 Consensus | TTGAGTGGAGTGCCTCTCATGATCTTGATGAGGAGA                 |     |     |     |     | GAGAGCTTGAAAAGCTGTTTCAG |     |
|             | 490                                                  | 500 | 510 | 520 | 530 | 540                     |     |
| 1 PTTG1     | CTGGGCCCCCTTCAACTGTGAAGATGCCCTCTCCACCATGGAAAT        |     |     |     |     | CAATCTGTTGCA            | 539 |
| 2 PTTG3     | CTGGGCCCCCTTCAACTGTGAAGATGCCCTCTCCACCATGGAAAT        |     |     |     |     | CAATCTGTTGCA            | 539 |
| 3 PTTG2     | CTGGGCCCCCTTCAACTGTGAAGATGCCCTCTCCACCATGGAAAT        |     |     |     |     | CAATCTGTTGCA            | 540 |
| 4 Consensus | CTGGGCCCCCTTCAACTGTGAAGATGCCCTCTCCACCATGGAAAT        |     |     |     |     | CAATCTGTTGCA            |     |
|             | 550                                                  | 560 | 570 | 580 | 590 | 600                     |     |
| 1 PTTG1     | GTCTCCTTCAAGCATTCTGTGACCCCTGGATGTTGAATTGCCACCTGTTTGT |     |     |     |     | CTGACAT                 | 599 |
| 2 PTTG3     | GTCTCCTTCAAGCATTCTGTGACCCCTGGATGTTGAATTGCCACCTGTTTGT |     |     |     |     | CTGACAT                 | 599 |
| 3 PTTG2     | GTCTCCTTCAAGCATTCTGTGACCCCTGGATGTTGA                 |     |     |     |     | -----CTGACAT            | 576 |
| 4 Consensus | GTCTCCTTCAAGCATTCTGTGACCCCTGGATGTTGAATTGCCACCTGTTTGT |     |     |     |     | CTGACAT                 |     |
|             | 610                                                  | 620 | 630 | 640 | 650 | 660                     |     |
| 1 PTTG1     | AGATATTTAA                                           |     |     |     |     |                         |     |
| 2 PTTG3     | AGATATTTAA                                           |     |     |     |     |                         |     |
| 3 PTTG2     | -----                                                |     |     |     |     |                         |     |
| 4 Consensus | AGATATTTAA                                           |     |     |     |     |                         |     |
